# Supplementary material for: Review of the top 5 cardiology studies of 2021-22
Source: PubMed Central journal article supplement — Can Pharm J (Ott). 2023 Jun 10;156(4):188–93. doi: 10.1177/17151635231176267 (PMC10331357; doi:10.1177/17151635231176267), 2023-06-10
Supplement: sj-pdf-1-cph-10.1177_17151635231176267.pdf [file sj-pdf-1-cph-10.1177_17151635231176267.pdf]

**APPENDIX 1 Voting frequency for the candidate studies (N=47 responses)**

| Trial                                                                                                                                                                                       | n | %    |
|---------------------------------------------------------------------------------------------------------------------------------------------------------------------------------------------|---|------|
| Empagliflozin in Heart Failure with a Preserved Ejection Fraction (EMPEROR-Preserved)                                                                                                       | 9 | 19.1 |
| Dapagliflozin in Heart Failure with Mildly Reduced or Preserved Ejection Fraction (DELIVER)                                                                                                 | 9 | 19.1 |
| Cardiovascular outcomes in adults with hypertension with evening versus morning dosing of usual antihypertensives in the UK (TIME)                                                          | 7 | 14.9 |
| Trial of Intensive Blood-Pressure Control in Older Patients with Hypertension (STEP)                                                                                                        | 5 | 10.6 |
| Side Effect Patterns in a Crossover Trial of Statin, Placebo and No Treatment (SAMSON)                                                                                                      | 4 | 8.5  |
| Rivaroxaban in Rheumatic Heart Disease–Associated Atrial Fibrillation (INVICTUS)                                                                                                            | 3 | 6.4  |
| Effect of Salt Substitution on Cardiovascular Events and Death (SSaSS)                                                                                                                      | 2 | 4.3  |
| Initial treatment with a single pill containing quadruple combination of quarter doses of blood pressure medicines versus standard dose monotherapy in patients with hypertension (QUARTET) | 2 | 4.3  |
| Treatment for mild chronic hypertension during pregnancy (CHAP)                                                                                                                             | 2 | 4.3  |
| Polypill strategy in secondary cardiovascular prevention (SECURE)                                                                                                                           | 2 | 4.3  |
| Cardiovascular Events with Finerenone in Kidney Disease and Type 2 Diabetes (FIGARO-DKD)                                                                                                    | 1 | 2.1  |
| Myocarditis Following Immunization With mRNA COVID-19 Vaccines in Members of the US Military                                                                                                | 1 | 2.1  |
| Chlorthalidone for Hypertension in Advanced Chronic Kidney Disease (CLICK)                                                                                                                  | 0 | 0.0  |
| Reduction of dietary sodium to less than 100 mmol in heart failure (SODIUM-HF)                                                                                                              | 0 | 0.0  |
| Apixaban Versus Rivaroxaban in Patients With Atrial Fibrillation and Valvular Heart Disease                                                                                                 | 0 | 0.0  |

Barry AR, et al. Review of the top 5 cardiology studies of 2021-22. Can Pharm J (Ott) 2023;156. DOI: 10.1177/17151635231176267.
